# Supplementary material for: Self-assembled gellan-based nanohydrogels as a tool for prednisolone delivery
Source: Royal Society of Chemistry journal article supplement (doi:10.1039/c2sm26178b), 2012-01-01
Supplement: c2sm26178b.pdf [file c2sm26178b.pdf]

## Supplementary Information

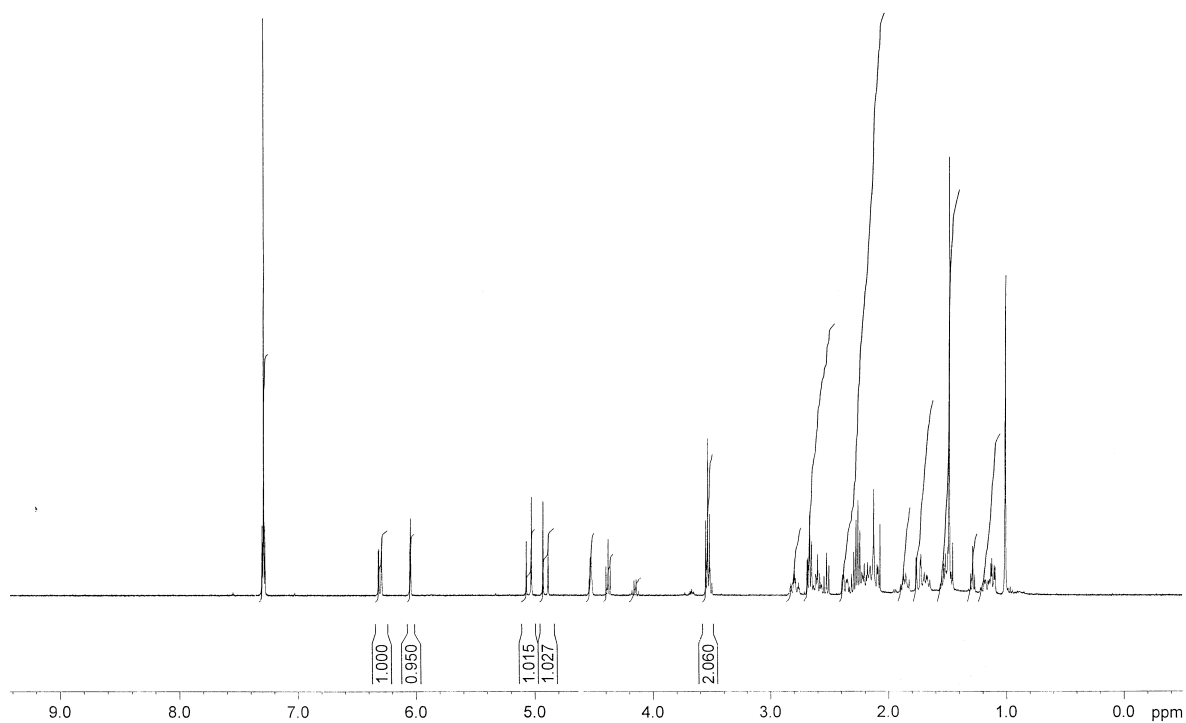

Figure S1

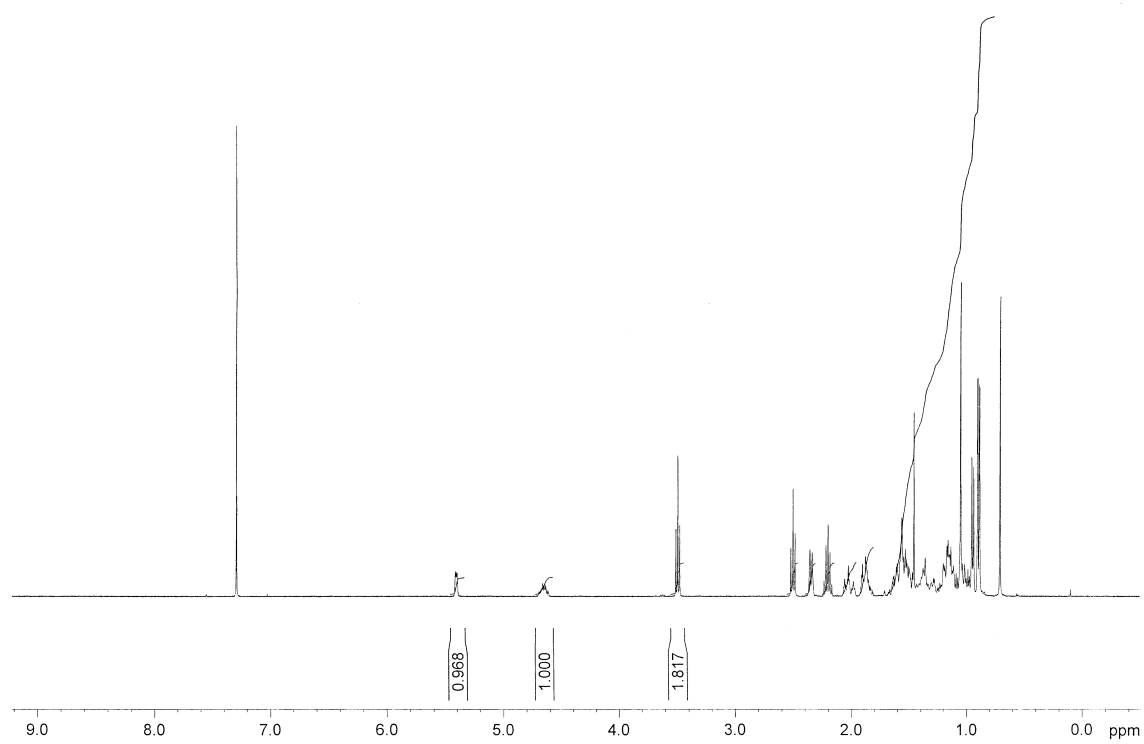

Figure S2

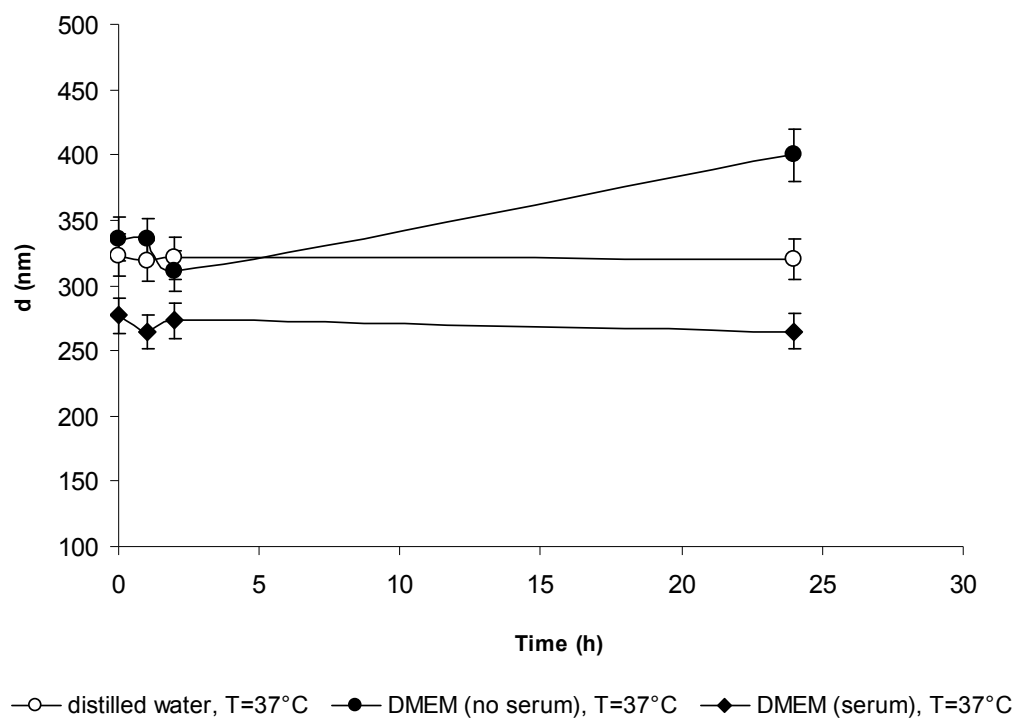

Figure S3

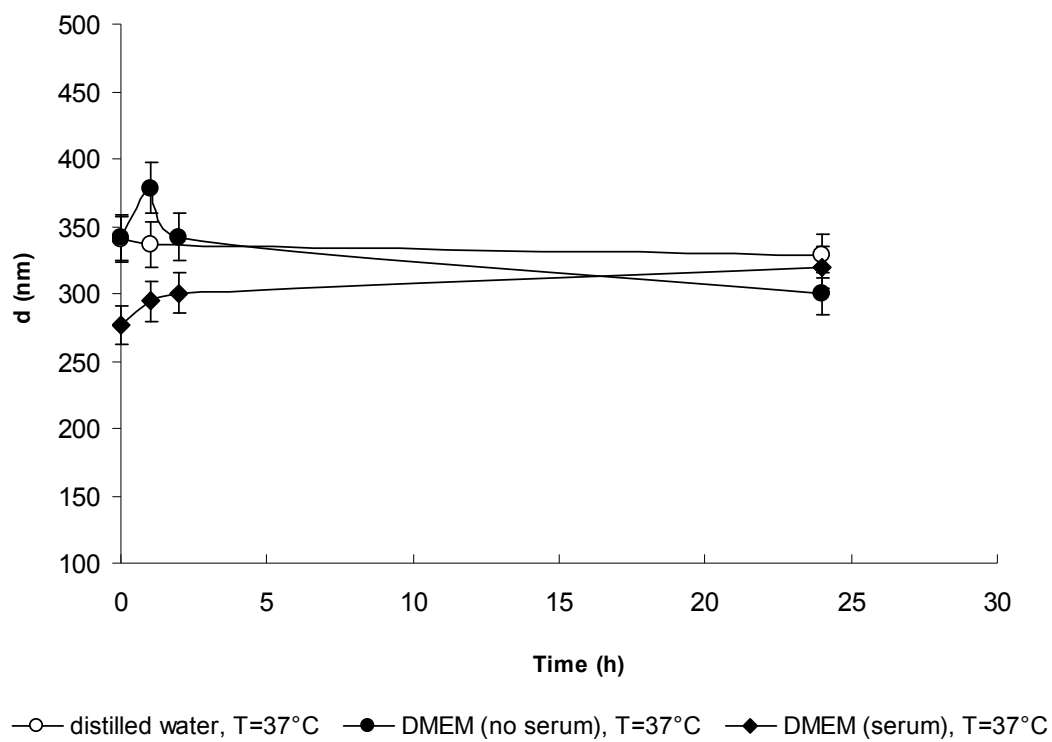

Figure S4

Table S1

|              | <b><sup>1</sup>H (ppm)</b> | <b><sup>13</sup>C (ppm)</b> |
|--------------|----------------------------|-----------------------------|
| <b>G'1</b>   | 4.577                      | 104.89                      |
| <b>G'2</b>   | 3.404                      | 76.60                       |
| <b>G'3</b>   | 3.589                      | 84.57                       |
| <b>G'4</b>   | 3.462                      | 70.50                       |
| <b>G'5</b>   | 3.462                      | 78.63                       |
| <b>G'6</b>   | 3.912                      | 63.22                       |
| <b>G'6'</b>  | 3.716                      | 63.22                       |
| <b>GA1</b>   | 4.539                      | 104.89                      |
| <b>GA2</b>   | 3.399                      | 75.35                       |
| <b>GA3</b>   | 3.648                      | 76.91                       |
| <b>GA4</b>   | 3.736                      | 83.00                       |
| <b>GA5</b>   | 3.883                      | 78.01                       |
| <b>G''1</b>  | 4.734                      | 105.68                      |
| <b>G''2</b>  | 3.325                      | 76.29                       |
| <b>G''3</b>  | 3.707                      | 76.92                       |
| <b>G''4</b>  | 3.619                      | 81.45                       |
| <b>G''5</b>  | 3.589                      | 77.39                       |
| <b>G''6</b>  | 3.951                      | 62.61                       |
| <b>G''6'</b> | 3.804                      | 62.61                       |
| <b>R1</b>    | 5.125                      | 103.34                      |
| <b>R2</b>    | 4.050                      | 73.02                       |
| <b>R3</b>    | 4.000                      | 72.85                       |
| <b>R4</b>    | 3.677                      | 83.80                       |
| <b>R5</b>    | 4.050                      | 73.02                       |
| <b>R6</b>    | 1.301                      | 19.39                       |

Fig. S1:  $^1\text{H}$ -NMR spectrum of Br-Pred.

Fig. S2:  $^1\text{H}$ -NMR spectrum of Br-CH derivative.

Fig. S3: Stability profile of Ge-Pred NHs in DMEM and in DMEM added with 10% of FBS.

Fig. S4: Stability profile of Ge-CH NHs in DMEM and in DMEM added with 10% of FBS.

Table S1: Assignment of gellan protonic resonances achieved at room temperature.
